# Supplementary material for: Synthetic RNA-based logic computation in mammalian cells
Source: PubMed Central journal article supplement (PMC6242901; doi:10.1038/s41467-018-07181-2), 2018-11-19
Supplement: 41467_2018_7181_MOESM1_ESM.pdf [file 41467_2018_7181_MOESM1_ESM.pdf]

## Supplementary Information

### **Synthetic RNA-based logic computation in mammalian cells**

Matsuura et al.

This file includes:

Supplementary Figures 1 to 7

Supplementary Tables 1 to 5

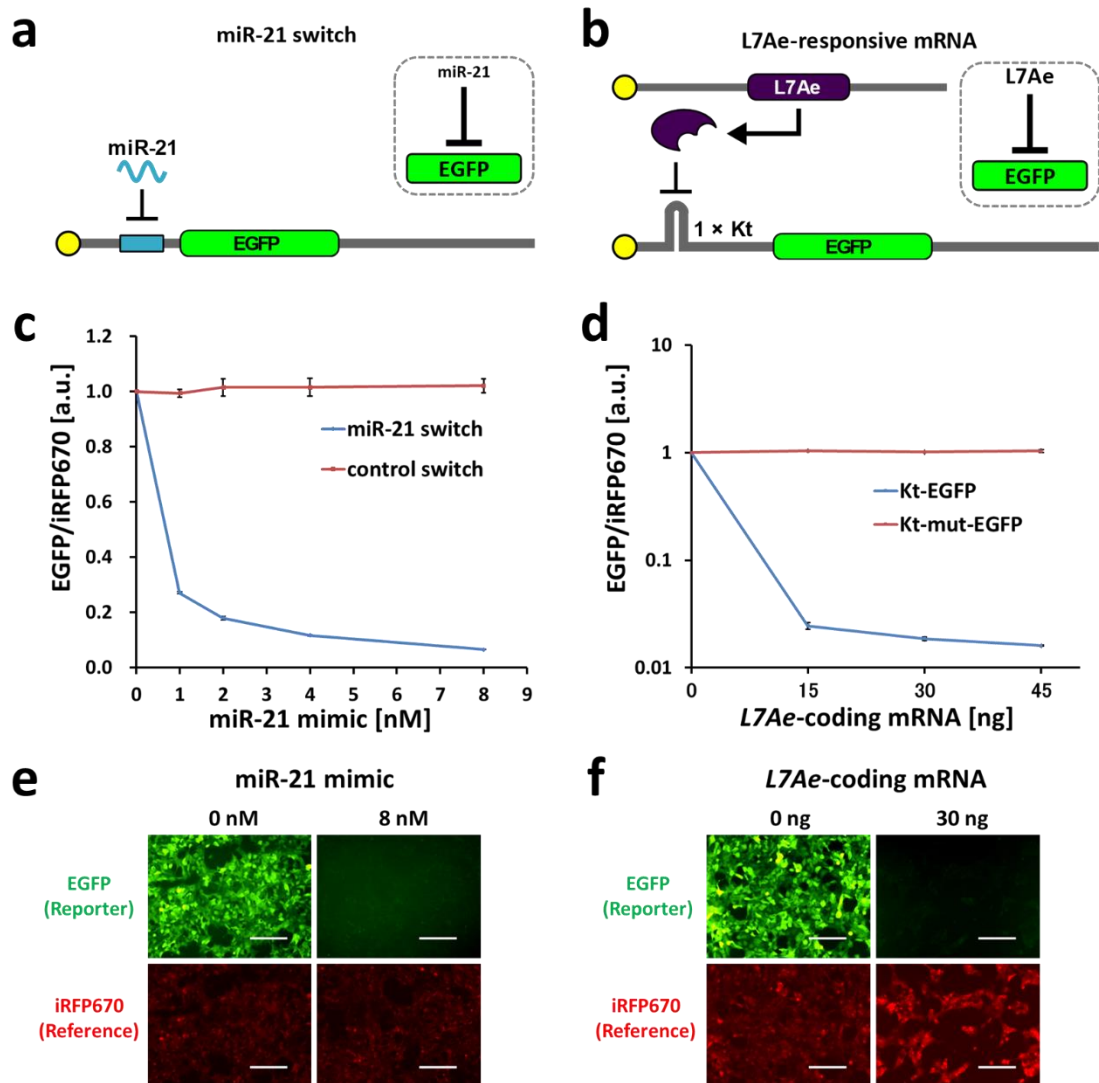

**Supplementary Figure 1.**

**Characterization of miRNA switch and L7Ae-responsive mRNA.**

(a, b) Schematic representation of the miR-21 switch (a) and the L7Ae-responsive mRNA (b). (c) Dose-response curves of the miR-21 switch with miR-21 mimic ranging from 0 to 8 nM in 293FT cells. Control switch is a mRNA without miRNA target sites. The highest fold-change was 15.3-fold, which was calculated by dividing the EGFP/iRFP670 ratio at 0 nM by that at 8 nM. (d) Dose-response curves of the L7Ae-responsive mRNA with L7Ae-coding mRNA ranging from 0 to 45 ng in 293FT cells. Kt-mut-EGFP mRNA is a mRNA with a mutant Kt motif within the 5'-UTR. Y-axis represents the mean EGFP per mean iRFP670 signal (EGFP/iRFP670). The ratio was normalized to the switch and the mRNA without miR-21 mimic (c) or L7Ae-coding mRNA (d), respectively. Data are shown as the mean  $\pm$  s.d. ( $n = 3$ ). (e) Representative microscopy images of cells co-transfected with the miRNA switch,

*iRFP670*-coding mRNAs and miR-21 mimic (0 nM or 8 nM). (f) Representative microscopy images of cells co-transfected with the L7Ae-responsive mRNA, *iRFP670*-coding mRNAs and L7Ae-coding mRNAs (0 ng or 30 ng). EGFP and iRFP670 were used as the reporter and the reference, respectively. Scale bars indicate 200  $\mu$ m. Transfection details are described in Supplementary Table 4.

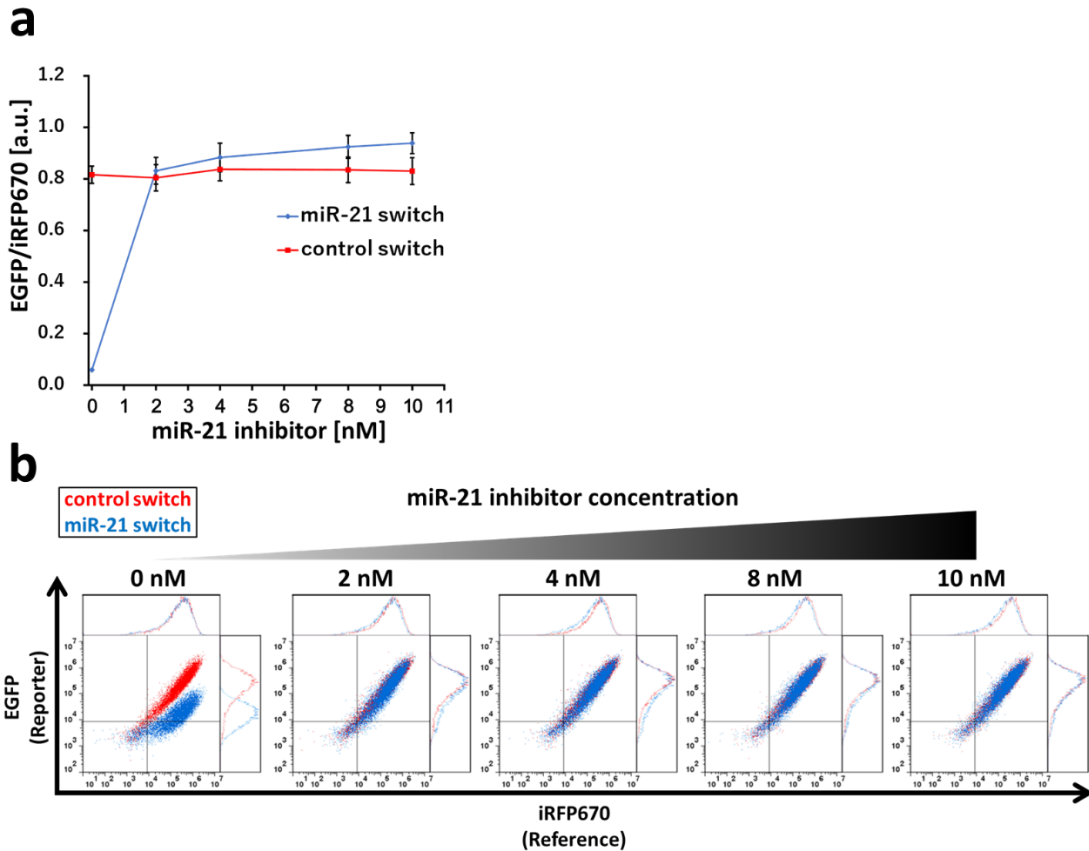

**Supplementary Figure 2.**

**miRNA switch in HeLa cells.**

Co-transfection of miR-21 switch and miR-21 inhibitor into HeLa cells. (a) Dose-response curves of the miR-21 switch with the miR-21 inhibitor ranging from 0 to 10 nM in HeLa cells. Control switch is a mRNA without miRNA target sites. Y-axis represents the mean EGFP per mean iRFP670 signal (EGFP/iRFP670). The ratios were not normalized. The highest fold-change was 15.8-fold, which was calculated by dividing the EGFP/iRFP670 ratio at 0 nM by that at 10 nM. Data are shown as the mean  $\pm$  s.d. ( $n = 3$ ). (b) Representative scatter plots and histograms for each switch in HeLa cells. Gates shown on the plots were generated by negative control (non-transfected) cells. Transfection details are described in Supplementary Table 4.

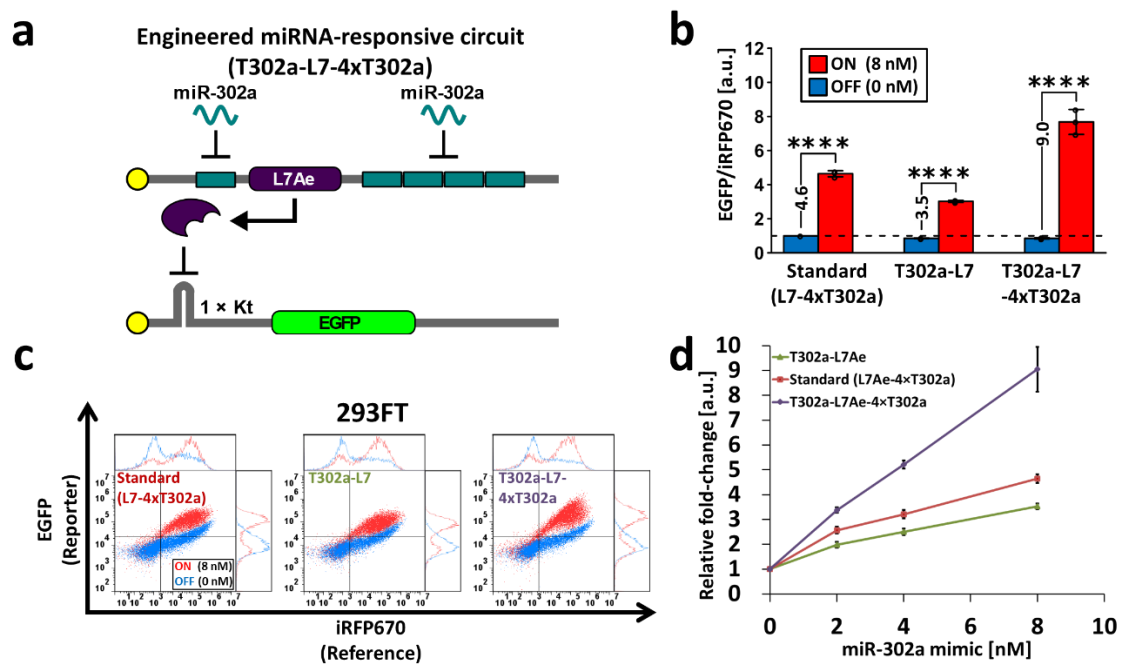

### Supplementary Figure 3.

#### Engineering of L7Ae-mediated miR-302a circuits.

(a) Schematic representation of engineered L7Ae-mediated miR-302a-responsive circuits. (b) The bar charts represent the output level (EGFP/iRFP670) for each circuit in 293FT cells. The output levels in OFF states of standard circuits were normalized to 1. (c) Representative scatter plots and histograms for each circuit in 293FT cells. Gates shown on the plots were generated by negative control (non-transfected) cells. ON state and OFF state (red and blue) show the results in the presence and absence of input miRNAs, respectively. ON states in 293FT cells show cells co-transfected with each circuit and miR-302a mimic (8 nM). (d) Dose-response curves of the engineered L7Ae-mediated miRNA circuits with miR-302a mimic ranging from 0 to 8 nM in 293FT cells. The EGFP/iRFP670 ratio in each circuit without miR-302a mimic was set to 1. Data are shown as the mean  $\pm$  s.d. ( $n = 3$ ). The levels of significance (unpaired two-tailed Student's t-test) are denoted as \*\*\*\* $P < 0.0001$ . Transfection details are described in Supplementary Table 4.

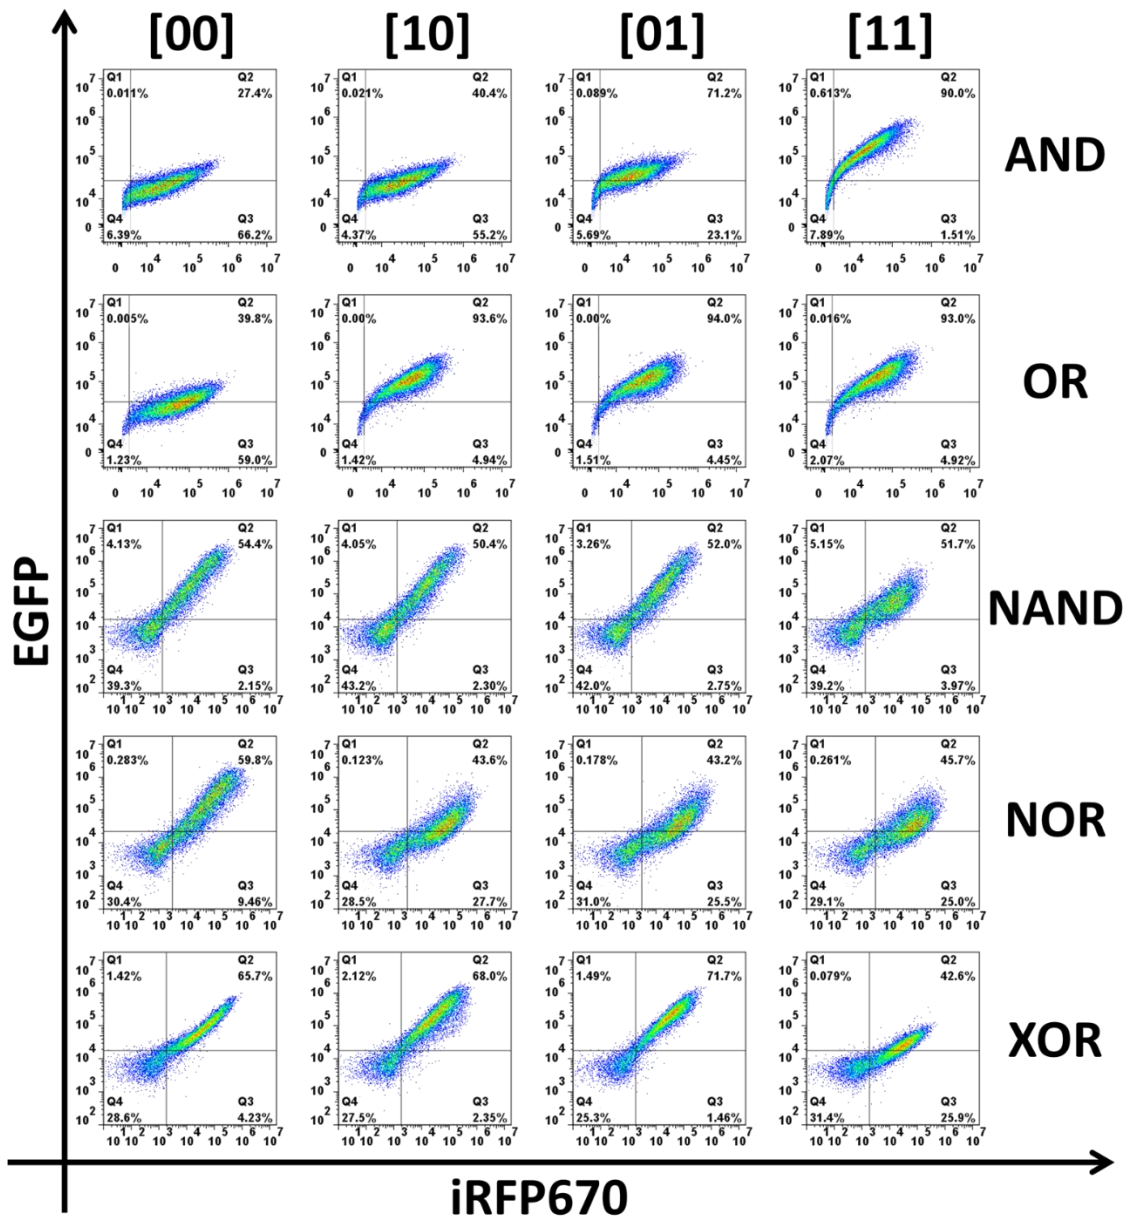

Supplementary Figure 4.

Representative flow cytometry data of the 2-input logic circuits shown in Fig. 3.

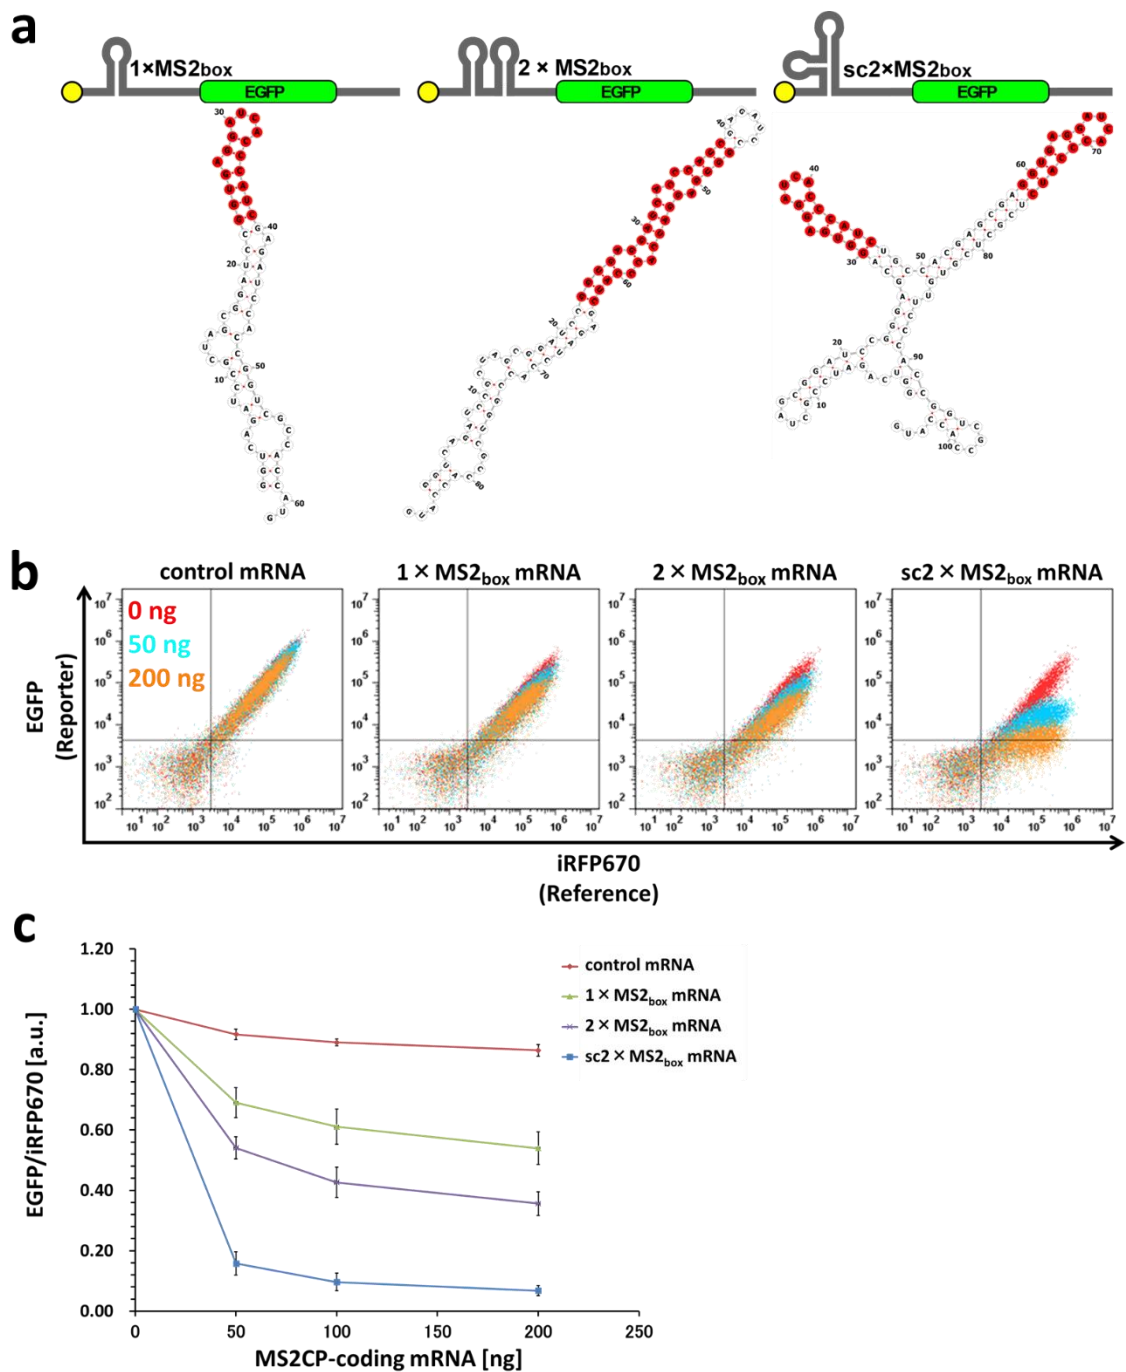

### Supplementary Figure 5.

#### Engineering of MS2CP-responsive mRNAs.

We designed three kinds of MS2CP-responsive mRNAs. (a) Schematic representation of the MS2CP-responsive mRNAs (top) and the predicted minimum free energy structure of the 5'-UTR in each mRNA (bottom) by RNAfold (<http://rna.tbi.univie.ac.at/cgi-bin/RNAWebSuite/RNAfold.cgi>). The structures were visualized by forna

(<http://rna.tbi.univie.ac.at/forna/>). Red colored sequences mark the binding motifs ( $MS2_{\text{box}}$ ). (b) Representative scatter plots for each *MS2CP*-responsive mRNA with 0 ng, 50 ng and 200 ng *MS2CP*-coding mRNAs in 293FT cells. Gates shown on the plots were generated by negative control (non-transfected) cells. (c) Dose-response curves of the *MS2CP*-responsive mRNAs with control mRNA ranging from 0 to 200 ng in 293FT cells. Control mRNA is mRNA without the *MS2CP* binding motif within the 5'-UTR. Y-axis represents the mean EGFP per mean iRFP670 signal (EGFP/iRFP670). Ratios were normalized to each *MS2CP*-responsive mRNA without *MS2CP*-coding mRNA. Data are shown as the mean  $\pm$  s.d. ( $n = 3$ ). Transfection details are described in Supplementary Table 4.



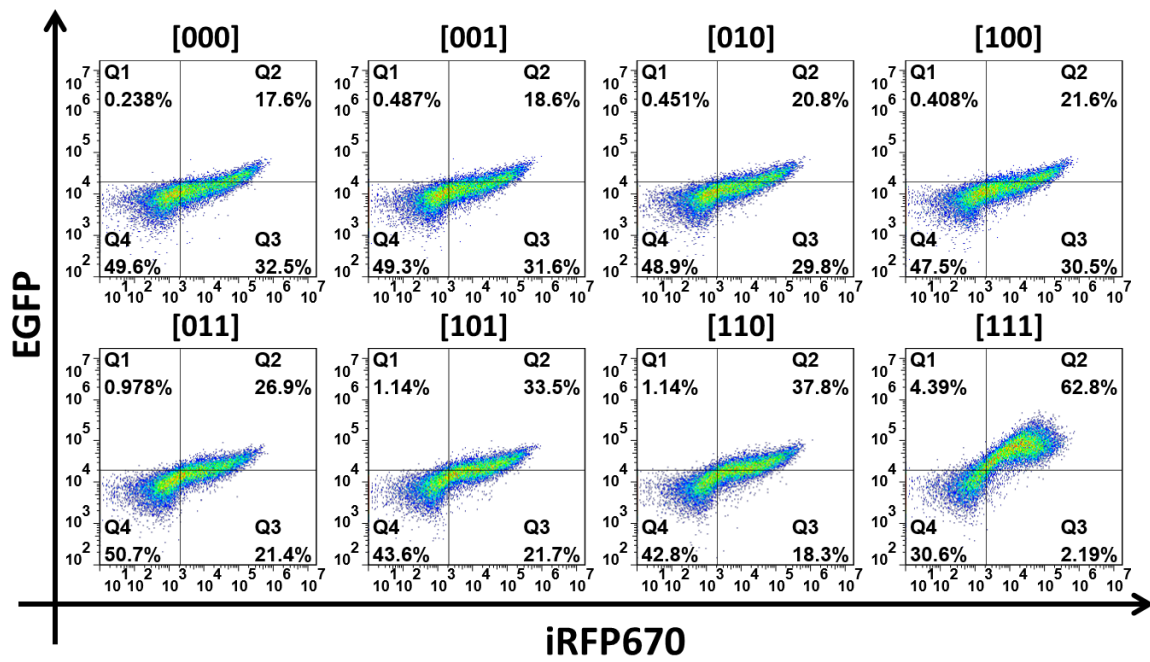

Supplementary Figure 6.

Representative flow cytometry data of the 3-input AND circuit shown in Fig. 4.

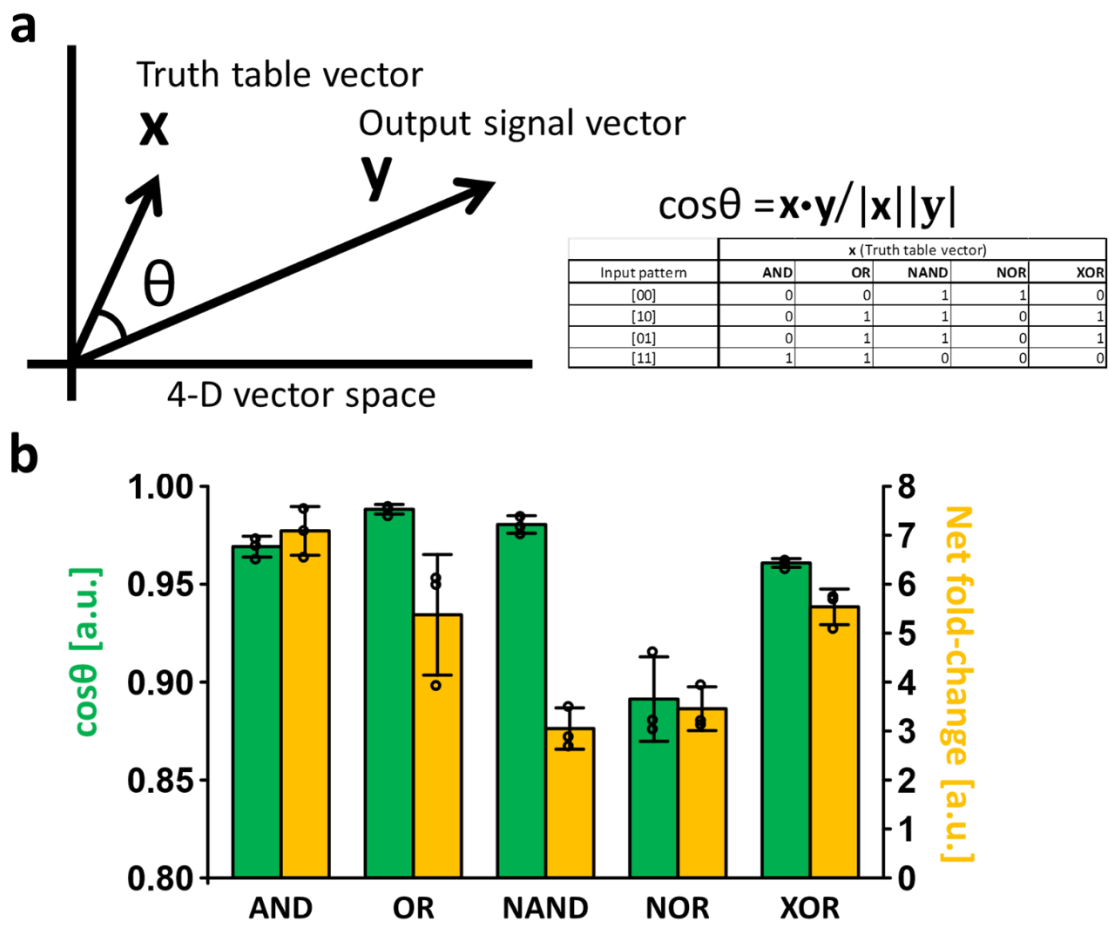

**Supplementary Figure 7.**

**Performance validation of each logic circuit based on cosine similarity and net fold-change.**

(a) Cosine similarity is calculated by the inner product between  $\mathbf{x}$  (truth table vector) and  $\mathbf{y}$  (output signal vector). (b) Validation of the performance of each logic circuit by cosine similarity and net fold-change. The results show the mean  $\pm$  s.d. ( $n = 3$ ).

**Supplementary Table 1.**

Tukey's multiple comparisons test based on the experiments in Fig. 3 (2-input miRNA-responsive logic circuits). The levels of significance are denoted as  $*P < 0.05$ ,  $**P < 0.01$ ,  $***P < 0.001$ ,  $****P < 0.0001$ , and n.s., not significant ( $P \geq 0.05$ ).

| Tukey's multiple comparisons test | AND  | OR   | NAND | NOR  | XOR  |
|-----------------------------------|------|------|------|------|------|
| [01]-[00]                         | n.s. | **   | n.s. | **** | **** |
| [10]-[00]                         | n.s. | **   | n.s. | **** | **** |
| [11]-[00]                         | **** | **   | ***  | **** | **   |
| [10]-[01]                         | n.s. | n.s. | n.s. | n.s. | *    |
| [11]-[01]                         | **** | n.s. | **   | n.s. | **** |
| [11]-[10]                         | **** | n.s. | ***  | n.s. | **** |

**Supplementary Table 2.**

Tukey's multiple comparisons test based on the experiments in Fig. 4 (3-input AND circuit).

The levels of significance are denoted as \*\*\*\* $P < 0.0001$  and n.s., not significant ( $P \geq 0.05$ ).

| Tukey's multiple comparisons test |      |             |      |
|-----------------------------------|------|-------------|------|
| 3-input AND                       |      |             |      |
| [001]-[000]                       | n.s. | [100]-[010] | n.s. |
| [010]-[000]                       | n.s. | [101]-[010] | n.s. |
| [011]-[000]                       | n.s. | [110]-[010] | n.s. |
| [100]-[000]                       | n.s. | [111]-[010] | **** |
| [101]-[000]                       | n.s. | [100]-[011] | n.s. |
| [110]-[000]                       | n.s. | [101]-[011] | n.s. |
| [111]-[000]                       | **** | [110]-[011] | n.s. |
| [010]-[001]                       | n.s. | [111]-[011] | **** |
| [011]-[001]                       | n.s. | [101]-[100] | n.s. |
| [100]-[001]                       | n.s. | [110]-[100] | n.s. |
| [101]-[001]                       | n.s. | [111]-[100] | **** |
| [110]-[001]                       | n.s. | [110]-[101] | n.s. |
| [111]-[001]                       | **** | [111]-[101] | **** |
| [011]-[010]                       | n.s. | [111]-[110] | **** |

**Supplementary Table 3.**

Tukey's multiple comparisons test based on the experiments in Fig. 5 (apoptosis regulatory 2-input AND circuit). The levels of significance are denoted as \*\*\*\* $P < 0.0001$  and n.s., not significant ( $P \geq 0.05$ ).

| Tukey's multiple comparisons test | apoptosis regulatory AND circuit |           |
|-----------------------------------|----------------------------------|-----------|
|                                   | SYTOX red                        | Annexin V |
| [01]-[00]                         | n.s.                             | n.s.      |
| [10]-[00]                         | n.s.                             | n.s.      |
| [11]-[00]                         | ****                             | ****      |
| [10]-[01]                         | n.s.                             | n.s.      |
| [11]-[01]                         | ****                             | ****      |
| [11]-[10]                         | ****                             | ****      |

**Supplementary Table 4.**

Transfection tables for all experiments in this study.

Figure 2b, c, d

| <b>Circuit</b>      | <b>Standard (L7-4xT21)</b> | <b>T21-L7</b> | <b>T21-L7-4xT21</b> |
|---------------------|----------------------------|---------------|---------------------|
| L7Ae-4xT21          | 30 ng                      |               |                     |
| T21-L7Ae            |                            | 30 ng         |                     |
| T21-L7Ae-4xT21      |                            |               | 30 ng               |
| Kt-EGFP             | 100 ng                     | 100 ng        | 100 ng              |
| iRFP670             | 100 ng                     | 100 ng        | 100 ng              |
| miR-21 mimic        | 0, 1, 2, 4 pmol            |               |                     |
| miRNA mimic control | 4, 3, 2, 0 pmol            |               |                     |
| Stemfect            | 1 $\mu$ L                  | 1 $\mu$ L     | 1 $\mu$ L           |

Figure 2e, f

| <b>Circuit</b>          | <b>Standard (L7-4xT21)</b> | <b>T21-L7-4xT21</b> |
|-------------------------|----------------------------|---------------------|
| L7Ae-4xT21              | 30 ng                      |                     |
| T21-L7Ae-4xT21          |                            | 30 ng               |
| Kt-EGFP                 | 100 ng                     | 100 ng              |
| iRFP670                 | 100 ng                     | 100 ng              |
| miR-21 inhibitor        | 0, 4 pmol                  |                     |
| miRNA inhibitor control | 4, 0 pmol                  |                     |
| MessengerMax            | 1 $\mu$ L                  | 1 $\mu$ L           |

Figure 3

| <b>Circuit</b>       | <b>AND</b>  |             |             |             |
|----------------------|-------------|-------------|-------------|-------------|
| <b>Input pattern</b> | <b>[00]</b> | <b>[10]</b> | <b>[01]</b> | <b>[11]</b> |
| T21-L7Ae-4×T21       | 15 ng       | 15 ng       | 15 ng       | 15 ng       |
| T302a-L7Ae-4×T302a   | 15 ng       | 15 ng       | 15 ng       | 15 ng       |
| Kt-EGFP              | 100 ng      | 100 ng      | 100 ng      | 100 ng      |
| iRFP670              | 100 ng      | 100 ng      | 100 ng      | 100 ng      |
| miR-21 mimic         |             | 4 pmol      |             | 4 pmol      |
| miR-302a mimic       |             |             | 4 pmol      | 4 pmol      |
| miRNA mimic control  | 8 pmol      | 4 pmol      | 4 pmol      |             |
| Stemfect             | 1 $\mu$ L   | 1 $\mu$ L   | 1 $\mu$ L   | 1 $\mu$ L   |

| <b>Circuit</b>       | <b>OR</b>   |             |             |             |
|----------------------|-------------|-------------|-------------|-------------|
| <b>Input pattern</b> | <b>[00]</b> | <b>[10]</b> | <b>[01]</b> | <b>[11]</b> |
| T21-T302a-L7Ae-4×T21 | 15 ng       | 15 ng       | 15 ng       | 15 ng       |
| Kt-EGFP              | 100 ng      | 100 ng      | 100 ng      | 100 ng      |
| iRFP670              | 100 ng      | 100 ng      | 100 ng      | 100 ng      |
| miR-21 mimic         |             | 4 pmol      |             | 4 pmol      |
| miR-302a mimic       |             |             | 4 pmol      | 4 pmol      |
| miRNA mimic control  | 8 pmol      | 4 pmol      | 4 pmol      |             |
| Stemfect             | 1 $\mu$ L   | 1 $\mu$ L   | 1 $\mu$ L   | 1 $\mu$ L   |

| <b>Circuit</b>                            | <b>NAND</b> |             |             |             |
|-------------------------------------------|-------------|-------------|-------------|-------------|
| <b>Input pattern</b>                      | <b>[00]</b> | <b>[10]</b> | <b>[01]</b> | <b>[11]</b> |
| T21-L7Ae-4×T21                            | 15 ng       | 15 ng       | 15 ng       | 15 ng       |
| T302a-L7Ae-4×T302a                        | 15 ng       | 15 ng       | 15 ng       | 15 ng       |
| Kt-MS2CP                                  | 150 ng      | 150 ng      | 150 ng      | 150 ng      |
| 2xMS2 <sub>box</sub> -EGFP (with m1pU, C) | 200 ng      | 200 ng      | 200 ng      | 200 ng      |
| iRFP670                                   | 100 ng      | 100 ng      | 100 ng      | 100 ng      |
| miR-21 mimic                              |             | 4 pmol      |             | 4 pmol      |
| miR-302a mimic                            |             |             | 4 pmol      | 4 pmol      |
| miRNA mimic control                       | 8 pmol      | 4 pmol      | 4 pmol      |             |
| MessengerMAX                              | 1 $\mu$ L   | 1 $\mu$ L   | 1 $\mu$ L   | 1 $\mu$ L   |

| Circuit                                   | NOR    |        |        |        |
|-------------------------------------------|--------|--------|--------|--------|
|                                           | [00]   | [10]   | [01]   | [11]   |
| T21-T302a-L7Ae-4×T21                      | 15 ng  | 15 ng  | 15 ng  | 15 ng  |
| Kt-MS2CP                                  | 100 ng | 100 ng | 100 ng | 100 ng |
| 2xMS2 <sub>box</sub> -EGFP (with m1pU, C) | 100 ng | 100 ng | 100 ng | 100 ng |
| iRFP670                                   | 100 ng | 100 ng | 100 ng | 100 ng |
| miR-21 mimic                              |        | 4 pmol |        | 4 pmol |
| miR-302a mimic                            |        |        | 4 pmol | 4 pmol |
| miRNA mimic control                       | 8 pmol | 4 pmol | 4 pmol |        |
| MessengerMAX                              | 1 μL   | 1 μL   | 1 μL   | 1 μL   |

| Circuit                                                    | XOR    |        |        |        |
|------------------------------------------------------------|--------|--------|--------|--------|
|                                                            | [00]   | [10]   | [01]   | [11]   |
| T302a-L7Ae-4×T302a                                         | 15 ng  | 15 ng  | 15 ng  | 15 ng  |
| T21-MS2CP-4×T21                                            | 100 ng | 100 ng | 100 ng | 100 ng |
| 2xMS2 <sub>box</sub> -T302a-EGFP-4×T302a<br>(with m1pU, C) | 50 ng  | 50 ng  | 50 ng  | 50 ng  |
| Kt-T21-EGFP-4×T21                                          | 100 ng | 100 ng | 100 ng | 100 ng |
| iRFP670                                                    | 100 ng | 100 ng | 100 ng | 100 ng |
| miR-21 mimic                                               |        | 4 pmol |        | 4 pmol |
| miR-302a mimic                                             |        |        | 4 pmol | 4 pmol |
| miRNA mimic control                                        | 8 pmol | 4 pmol | 4 pmol |        |
| MessengerMAX                                               | 1 μL   | 1 μL   | 1 μL   | 1 μL   |



Figure 4b

| Circuit             | 3-input AND |           |           |           |           |           |           |           |
|---------------------|-------------|-----------|-----------|-----------|-----------|-----------|-----------|-----------|
|                     | [000]       | [001]     | [010]     | [100]     | [011]     | [101]     | [110]     | [111]     |
| T21-L7Ae-4×T21      | 15 ng       | 15 ng     | 15 ng     | 15 ng     | 15 ng     | 15 ng     | 15 ng     | 15 ng     |
| T302a-L7Ae-4×T302a  | 15 ng       | 15 ng     | 15 ng     | 15 ng     | 15 ng     | 15 ng     | 15 ng     | 15 ng     |
| T206-L7Ae-4×T206    | 15 ng       | 15 ng     | 15 ng     | 15 ng     | 15 ng     | 15 ng     | 15 ng     | 15 ng     |
| Kt-EGFP             | 100 ng      | 100 ng    | 100 ng    | 100 ng    | 100 ng    | 100 ng    | 100 ng    | 100 ng    |
| iRFP670             | 100 ng      | 100 ng    | 100 ng    | 100 ng    | 100 ng    | 100 ng    | 100 ng    | 100 ng    |
| miR-21 mimic        |             | 4 pmol    |           |           | 4 pmol    | 4 pmol    |           | 4 pmol    |
| miR-302a mimic      |             |           | 4 pmol    |           | 4 pmol    |           | 4 pmol    | 4 pmol    |
| miR-206 mimic       |             |           |           | 4 pmol    |           | 4 pmol    | 4 pmol    | 4 pmol    |
| miRNA mimic control | 12 pmol     | 8 pmol    | 8 pmol    | 8 pmol    | 4 pmol    | 4 pmol    | 4 pmol    |           |
| MessengerMAX        | 1 $\mu$ L   | 1 $\mu$ L | 1 $\mu$ L | 1 $\mu$ L | 1 $\mu$ L | 1 $\mu$ L | 1 $\mu$ L | 1 $\mu$ L |

Figure 5c, d

| Circuit                     | Apoptosis regulatory 2-input AND |           |           |           | hBax only |
|-----------------------------|----------------------------------|-----------|-----------|-----------|-----------|
|                             | [00]                             | [10]      | [01]      | [11]      |           |
| T206-L7Ae-P2A-Bcl2-4×T206   | 15 ng                            | 15 ng     | 15 ng     | 15 ng     |           |
| T302a-L7Ae-P2A-Bcl2-4×T302a | 15 ng                            | 15 ng     | 15 ng     | 15 ng     |           |
| Kt-hBax                     | 300 ng                           | 300 ng    | 300 ng    | 300 ng    |           |
| hBax                        |                                  |           |           |           | 300 ng    |
| miR-206 mimic               |                                  | 2 pmol    |           | 2 pmol    |           |
| miR-302a mimic              |                                  |           | 2 pmol    | 2 pmol    |           |
| miRNA mimic control         | 4 pmol                           | 2 pmol    | 2 pmol    |           |           |
| MessengerMAX                | 1 $\mu$ L                        | 1 $\mu$ L | 1 $\mu$ L | 1 $\mu$ L | 1 $\mu$ L |

Supplementary Figure 1c

| <b>switch</b>       | <b>miR-21 switch</b> | <b>Control switch (EGFP)</b> |
|---------------------|----------------------|------------------------------|
| T21-EGFP            | 100 ng               |                              |
| EGFP                |                      | 100 ng                       |
| iRFP670             | 100 ng               | 100 ng                       |
| miR-21 mimic        | 0, 0.5, 1, 2, 4 pmol | 0, 0.5, 1, 2, 4 pmol         |
| miRNA mimic control | 4, 3.5, 3, 2, 0 pmol | 4, 3.5, 3, 2, 0 pmol         |
| MessengerMAX        | 1 $\mu$ L            | 1 $\mu$ L                    |

Supplementary Figure 1d

| <b>Protein-responsive mRNA</b> | <b>L7Ae-responsive mRNA (Kt-EGFP)</b> | <b>Control mRNA (Kt-mut-EGFP)</b> |
|--------------------------------|---------------------------------------|-----------------------------------|
| L7Ae                           | 0, 15, 30, 45 ng                      | 0, 15, 30, 45 ng                  |
| Kt-EGFP                        | 100 ng                                |                                   |
| Kt-mut-EGFP                    |                                       | 100 ng                            |
| iRFP670                        | 100 ng                                | 100 ng                            |
| MessengerMAX                   | 1 $\mu$ L                             | 1 $\mu$ L                         |

Supplementary Figure 2a, b

| <b>switch</b>           | <b>miR-21 switch</b> | <b>Control switch (EGFP)</b> |
|-------------------------|----------------------|------------------------------|
| T21-EGFP                | 100 ng               |                              |
| EGFP                    |                      | 100 ng                       |
| iRFP670                 | 100 ng               | 100 ng                       |
| miR-21 inhibitor        | 0, 1, 2, 4, 5 pmol   | 0, 1, 2, 4, 5 pmol           |
| miRNA inhibitor control | 5, 4, 3, 1, 0 pmol   | 5, 4, 3, 1, 0 pmol           |
| MessengerMAX            | 1 $\mu$ L            | 1 $\mu$ L                    |

Supplementary Figure 3b, c, d

| <b>Circuit</b>      | <b>Standard<br/>(L7-4xT302a)</b> | <b>T302a-L7</b> | <b>T302a-L7-<br/>4xT302a</b> |
|---------------------|----------------------------------|-----------------|------------------------------|
| L7Ae-4xT302a        | 30 ng                            |                 |                              |
| T302a-L7Ae          |                                  | 30 ng           |                              |
| T302a-L7Ae-4xT302a  |                                  |                 | 30 ng                        |
| Kt-EGFP             | 100 ng                           | 100 ng          | 100 ng                       |
| iRFP670             | 100 ng                           | 100 ng          | 100 ng                       |
| miR-302a mimic      | 0, 1, 2, 4 pmol                  |                 |                              |
| miRNA mimic control | 4, 3, 2, 0 pmol                  |                 |                              |
| MessengerMAX        | 1 $\mu$ L                        | 1 $\mu$ L       | 1 $\mu$ L                    |

Supplementary Figure 5b

| <b>Protein-responsive<br/>mRNA</b> | <b>MS2CP-responsive mRNA<br/>(sc2xMS2<sub>box</sub>)</b> | <b>MS2CP-responsive mRNA<br/>(2xMS2<sub>box</sub>)</b> |
|------------------------------------|----------------------------------------------------------|--------------------------------------------------------|
| MS2CP                              | 0, 50, 100, 200 ng                                       | 0, 50, 100, 200 ng                                     |
| sc2xMS2 <sub>box</sub> -EGFP       | 100 ng                                                   |                                                        |
| 2xMS2 <sub>box</sub> -EGFP         |                                                          | 100 ng                                                 |
| iRFP670                            | 100 ng                                                   | 100 ng                                                 |
| MessengerMAX                       | 1 $\mu$ L                                                | 1 $\mu$ L                                              |
| <b>Protein-responsive<br/>mRNA</b> | <b>MS2CP-responsive mRNA<br/>(1xMS2<sub>box</sub>)</b>   | <b>control mRNA (EGFP)</b>                             |
| MS2CP                              | 0, 50, 100, 200 ng                                       | 0, 50, 100, 200 ng                                     |
| 1xMS2 <sub>box</sub> -EGFP         | 100 ng                                                   |                                                        |
| EGFP                               |                                                          | 100 ng                                                 |
| iRFP670                            | 100 ng                                                   | 100 ng                                                 |
| MessengerMAX                       | 1 $\mu$ L                                                | 1 $\mu$ L                                              |

**Supplementary Table 5.**

List of primers and oligonucleotides used in this study.

| <b>Fwd and Rev Primer</b> |             |                                                                                                                                                               |
|---------------------------|-------------|---------------------------------------------------------------------------------------------------------------------------------------------------------------|
| <i>Name</i>               | <i>Type</i> | <i>Sequence (5'&gt;3')</i>                                                                                                                                    |
| TAP_T7_G3C<br>fwd primer  | 5'-UTR      | CAGTGAATTGTAATACGACTCACTATAGGGC                                                                                                                               |
| Rev5UTR                   | 5'-UTR      | CATGGTGGCGACCGGTGTCTTATATTTCTTCTTACTC                                                                                                                         |
| GCT7pro_5UT<br>R2         | 5'-UTR      | GCTAATACGACTCACTATAGGTTCCCTTAATCGCGGATCC                                                                                                                      |
| L7Ae_IVTfwd               | ORF         | CACCGGTCGCCACCATGTACGTGAGATTTGAGGTTCCCT<br>G                                                                                                                  |
| TAP_IVTrev                | ORF         | GCCCCGCAGAAGGTCTAGACTATCACTCGAGATGCATA<br>TGAGATC                                                                                                             |
| Fwd3UTR                   | 3'-UTR      | TCTAGACCTTCTGCGGGGC                                                                                                                                           |
| Rev3UTR2T20               | 3'UTR       | TTTTTTTTTTTTTTTTTTTTTTCCTACTCAGGCTTTATTCAA<br>GACCAAG                                                                                                         |
| 3UTR120A                  | 3'-UTR      | TTTTTTTTTTTTTTTTTTTTTTTTTTTTTTTTTTTTTTTTTTTT<br>TTTTTTTTTTTTTTTTTTTTTTTTTTTTTTTTTTTTTTTTTTTT<br>TTTTTTTTTTTTTTTTTTTTTTTTTTTTTTTTTTTTTTCCTACTCA<br>GGCTTTATTCA |
| Fwd3UTRmiR                | 3'-UTR      | TCTAGACCTTCTGCGGGGCGACGAGCTGTACAAGTAAT<br>TCTAGAAGATC                                                                                                         |
| Rev 3UTR<br>miRT20        | 3'-UTR      | TTTTTTTTTTTTTTTTTTTTTTCCTACTCAGGCTTTATTACAG<br>CTTTACTTGACGCCCG                                                                                               |
| KWC0131_T7-<br>kt-EGFP_Fw | 5'-UTR      | GAAATTAATACGACTCACTATAGGATCCGTGATCGGAAA<br>CGTGAGATCCACCTCAGATCCGCTAGGACACCCGCAG<br>TCG                                                                       |
| TAPEGFP_IVTf<br>wd        | ORF         | CACCGGTCGCCACCATGGGATCCGTGAGCAAGGGC                                                                                                                           |
| Rev3UTR for<br>4×T        | 3'-UTR      | TTTTTTTTTTTTTTTTTTTTTTCCTACTCAGGCTTTATTAC                                                                                                                     |
| TAP_MS2CP_I<br>VTfwd      | ORF         | CACCGGTCGCCACCATGGGATCCGCTTC                                                                                                                                  |
| GCT7CMV_G                 | 5'-UTR      | GCTAATACGACTCACTATAGGTCAGATCCGCTAGCG                                                                                                                          |

|                    |        |                                                                      |
|--------------------|--------|----------------------------------------------------------------------|
| Rev5UTR for MS2    | 5'-UTR | CATGGTGGCGACCGGTGGG                                                  |
| MS2-T302a_Rev5U TR | 5'-UTR | CATGGTGGCGACCGGTGTGATGTACTTAAACGTGGATG TACTTGCTATTACCGGGAACACGAGCGAG |
| Rev3UTR for 4×T    | 3'-UTR | TTTTTTTTTTTTTTTTTTTTTTCCTACTCAGGCTTTATTAC                            |
| hBax_IVTfwd        | ORF    | CACCGGTCGCCACCATGGACGGGTC                                            |
| hBax_IVTrev        | ORF    | GCCCCGCAGAAGGTCTAGAGTCAGCCCATCTTCTTCCA GATG                          |
| 5UTR_sc_rev        | 5'-UTR | CATGGTGGCGACCGGTGGGAAC                                               |
| Rev_5UTRmot        | 5'-UTR | CATGGTGGCGACCGGTGGATC                                                |

| <b>Oligonucleotide</b>   |             |                                                                                                                                                         |
|--------------------------|-------------|---------------------------------------------------------------------------------------------------------------------------------------------------------|
| <i>Name</i>              | <i>Type</i> | <i>Sequence (5'&gt;3')</i>                                                                                                                              |
| IVT_5prime_UTR           | 5'-UTR      | CAGTGAATTGTAATACGACTCACTATAGGGCGA ATTAAGAGAGAAAAGAAGAGTAAGAAGAAATAT AAGACACCGGTCGCCACCATG                                                               |
| 5UTRtemp_T21-5p          | 5'-UTR      | CGACTCACTATAGGTTCCGCGATCGCGGATCC TCAACATCAGTCTGATAAGCTAAGATCACACCG GTCGCCACCATG                                                                         |
| IVT_3prime_UTR           | 3'-UTR      | TCTAGACCTTCTGCGGGGCTTGCCTTCTGGCC ATGCCCTTCTTCTCTCCCTTGACCTGTACCTC TTGGTCTTTGAATAAAGCCTGAGTAGG                                                           |
| Spacer5UTRFwd            | 5'-UTR      | ACACCCGCAGATCGAGAAGAAGCGAATTAAG AGAGAAAAGAAGAGTAAGAAGAAATATAAGACA CCGGTCGCCACCATG                                                                       |
| 3UTRtemp_4×T302a-5p      | 3'-UTR      | CCTACTCAGGCTTTATTACGCGGCCGCACTTA AACGTGGATGTACTTGCTACTTAAACGTGGATG TACTTGCTACTTAAACGTGGATGTACTTGCTACT TAAACGTGGATGTACTTGCTCAGCTCGTCGCC CCGCAGAAGGTCTAGA |
| 5UTRtemp_T21-5p-T302a-5p | 5'-UTR      | CGACTCACTATAGGTTCCGCGATCGCGGATCC TCAACATCAGTCTGATAAGCTAAGATAAAGCAA GTACATCCACGTTTAAGTCACCGGTCGCCACC                                                     |

|                    |        |                                                                                                                                                               |
|--------------------|--------|---------------------------------------------------------------------------------------------------------------------------------------------------------------|
|                    |        | ATG                                                                                                                                                           |
| Spacer+T21 5UTRFwd | 5'-UTR | ACACCCGCAGATCGAGAAGAAGGCGAATTAAG<br>AGATCAACATCAGTCTGATAAGCTAATAAGACA<br>CCGGTCGCCACCATG                                                                      |
| 3UTRtemp_4xT206    | 3'-UTR | CCTACTCAGGCTTTATTACGCGGCCGCTGGA<br>ATGTAAGGAAGTGTGTGGTGAATGTAAGGAA<br>GTGTGTGGTGAATGTAAGGAAGTGTGTGGTG<br>GAATGTAAGGAAGTGTGTGGCAGCTCGTCGCC<br>CCGCAGAAGGTCTAGA |
| 5UTR_MS2x1         | 5'-UTR | GGTCAGATCCGCTAGCGGATCCGGTGAGGATC<br>ACCCATCGAGATCCACCGGTCGCCACCATG                                                                                            |
| 5UTR_MS2x2         | 5'-UTR | GGTCAGATCCGCTAGCGGATCCGGTGAGGATC<br>ACCCATCGAGATCCGGTGAGGATCACCCATCG<br>AGATCCACCGGTCGCCACCATG                                                                |
